# Supplementary material for: High-resolution Carbon cycling data from 2019 to 2021 measured at six Austrian LTER sites
Source: Copernicus journal article supplement (doi:10.5194/essd-2024-110), 2024-06-03
Supplement: Supplementary file [file Table 3_SPEI.pdf › Table 3_SPEI.pdf]

Table 1. Comparison between long-term (1980-2010) meteorological drought (SPEI - Standardized Precipitation Evapotranspiration Index) and the measurement years during the growing season (May-September). Significant differences between these years and the long-term averages are shown: \*\*\*  $p < 0.001$ ; \*\*  $p < 0.005$ ; \*  $p < 0.01$  according to a Mann-Whitney U Test. SPEI was calculated using a 30 days window in a daily resolution using gridded data: <https://data.hub.geosphere.at/dataset/winfore-v2-1d-1km> (Haslinger & Bartsch, 2016). Negative values indicate dry years.

| Site Code | 1980-2010  | 2019          | 2020         | 2021        |
|-----------|------------|---------------|--------------|-------------|
| ZOE       | -0.05±0.94 | -0.49±1.22*** | 0.42±0.69*** | -0.02±1.39  |
| KLL       | -0.01±0.99 | -0.23±1.22    | 0.39±0.86*** | -0.02±1.24  |
| KAS       | -0.05±0.97 | -0.1±1.17     | -0.12±0.78   | 0.23±1.07** |
| PUE       | -0.02±0.94 | -0.54±1.26*** | 0.17±0.59**  | -0.12±1.2   |
| NSS       | -0.01±1    | -0.22±1.13*   | 0.2±0.87**   | -0.2±1.34   |
| ROS       | -0.03±0.98 | -0.34±1.01*** | 0.17±0.83    | -0.28±1.08  |
